# Supplementary material
Source: Elsevier journal article supplement (https://comptes-rendus.academie-sciences.fr/chimie/article/10.1016/j.crci.2011.11.016/file/attach/mmc1.pdf)
Supplement: mmc1 [file mmc1.pdf]

Supplementary Material for:

**“Hydrothermal Friedel-Crafts Type Alkylation of Phenols with Alcohols in Diluted Acids”**

By B. Smutek, F. Goettmann<sup>1</sup>, W. Kunz

The following tables list the amounts of detected reaction products (as determined by GC-FID using toluene as an internal standard) obtained in the hydrothermal alkylation of phenol (15 mmol) with benzyl alcohol (0.5 mmol) after 16h of reaction. The following figure gives the label of the various obtained molecules

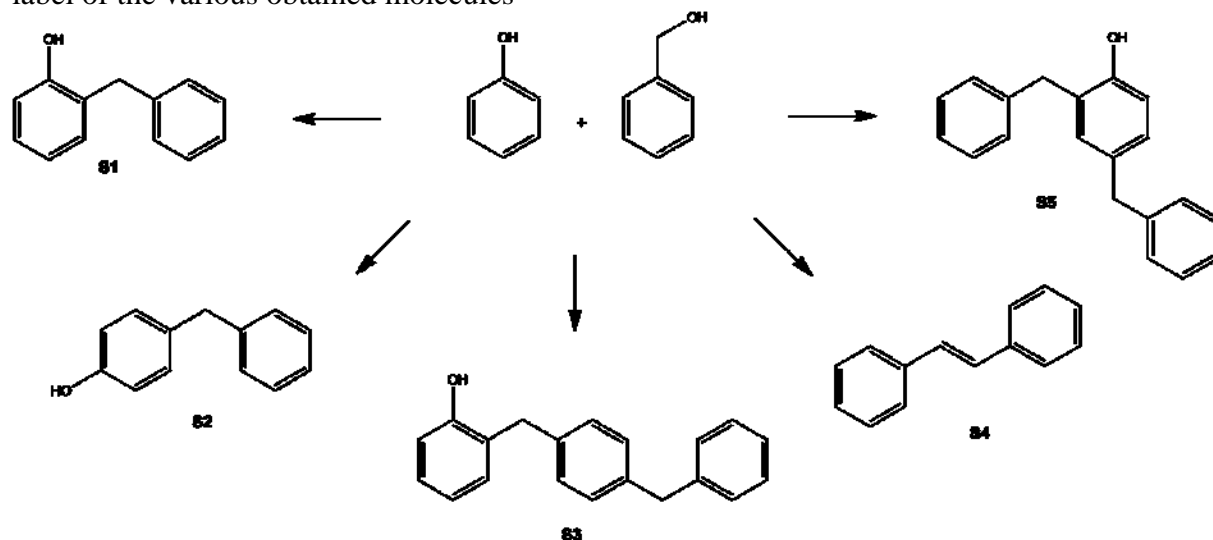

**Table S1:** Alkylation of phenol with benzyl alcohol in aqueous media.

| solvent  | temperature | benzyl alcohol | S1  | S2  | S3* | S4 | S5  | o/p-ratio (mono-substituted product) |
|----------|-------------|----------------|-----|-----|-----|----|-----|--------------------------------------|
| water    | 125°C       | 100%           | 0%  | 0%  | 0%  | 0% | 0%  | -                                    |
|          | 150°C       | 100%           | 0%  | 0%  | 0%  | 0% | 0%  | -                                    |
|          | 180°C       | 99%            | 1%  | 0%  | 0%  | 0% | 0%  | -                                    |
|          | 200°C       | 93%            | 4%  | 3%  | 0%  | 0% | 0%  | 61:39                                |
|          | 220°C       | 86%            | 8%  | 6%  | 0%  | 0% | 0%  | 59:41                                |
| 0.5M HCl | 125°C       | 0%             | 44% | 44% | 3%  | 3% | 6%  | 50:50                                |
|          | 150°C       | 1%             | 38% | 35% | 9%  | 4% | 14% | 52:48                                |
|          | 180°C       | 0%             | 35% | 31% | 12% | 2% | 20% | 53:47                                |
|          | 200°C       | 0%             | 36% | 31% | 12% | 1% | 20% | 53:47                                |
|          | 220°C       | 0%             | 33% | 30% | 13% | 2% | 22% | 53:47                                |
| 1M HCl   | 125°C       | 16%            | 34% | 37% | 4%  | 3% | 6%  | 48:52                                |
|          | 150°C       | 0%             | 37% | 37% | 9%  | 2% | 15% | 50:50                                |
|          | 180°C       | 0%             | 35% | 34% | 12% | 1% | 19% | 51:49                                |
|          | 200°C       | 6%             | 34% | 32% | 11% | 1% | 17% | 51:49                                |
|          | 220°C       | 0%             | 32% | 30% | 13% | 1% | 23% | 52:48                                |

Normalized results after 16h at different temperatures. \*) There are two isomers of benzyl benzyl phenol.]

**Table S2:** Alkylation of phenol with benzyl alcohol: Variation of the acids.

| acid  | concentration | benzyl alcohol | S1  | S2  | S3* | S4 | S5  | o/p-ratio (mono-substituted product) |
|-------|---------------|----------------|-----|-----|-----|----|-----|--------------------------------------|
| HCl   | 1M            | 0%             | 35% | 34% | 11% | 1% | 19% | 51:49                                |
| HCl   | 0.5M          | 0%             | 35% | 31% | 12% | 2% | 20% | 53:47                                |
| HCl   | 0.4M          | 0%             | 34% | 30% | 14% | 2% | 20% | 53:47                                |
| HCl   | 0.3M          | 0%             | 35% | 30% | 13% | 2% | 20% | 53:47                                |
| HCl   | 0.2M          | 0%             | 34% | 29% | 14% | 3% | 20% | 54:46                                |
| HCl   | 0.1M          | 0%             | 34% | 28% | 14% | 4% | 20% | 55:45                                |
| HCl   | 0.05M         | 1%             | 33% | 27% | 14% | 4% | 20% | 55:45                                |
| HCl   | 0.04M         | 1%             | 33% | 27% | 14% | 4% | 20% | 55:45                                |
| HCl   | 0.03M         | 2%             | 33% | 27% | 14% | 4% | 19% | 55:45                                |
| HCl   | 0.02M         | 6%             | 33% | 26% | 13% | 4% | 18% | 55:45                                |
| HCl   | 0.01M         | 17%            | 29% | 23% | 12% | 4% | 15% | 56:44                                |
| HCl   | 0.005M        | 31%            | 28% | 22% | 7%  | 2% | 9%  | 56:44                                |
| HOAc  | 1M            | 53%            | 23% | 17% | 3%  | 0% | 4%  | 58:42                                |
| HOAc  | 0.5M          | 51%            | 25% | 19% | 2%  | 0% | 3%  | 57:43                                |
| HOAc  | 0.25M         | 72%            | 15% | 11% | 0%  | 0% | 1%  | 58:42                                |
| HOAc  | 0.1M          | 79%            | 12% | 9%  | 0%  | 0% | 0%  | 58:42                                |
| HOAc  | 0.05M         | 84%            | 9%  | 7%  | 0%  | 0% | 0%  | 59:41                                |
| HCOOH | 1M            | 14%            | 32% | 25% | 11% | 3% | 15% | 56:44                                |
| HCOOH | 0.5M          | 28%            | 29% | 22% | 8%  | 2% | 10% | 56:44                                |
| HCOOH | 0.25M         | 42%            | 26% | 20% | 5%  | 0% | 7%  | 56:44                                |
| HCOOH | 0.1M          | 56%            | 21% | 16% | 2%  | 0% | 4%  | 57:43                                |
| HCOOH | 0.05M         | 66%            | 18% | 14% | 0%  | 0% | 2%  | 57:43                                |

Normalized results after 16h at 180°C. Obviously not all the benzyl alcohol was detected for 0.5M HOAc. \*) There are two isomers of benzyl-benzyl phenol.
